# Supplementary material
Source: publisher figshare collection journal article supplement (https://springernature.figshare.com/ndownloader/files/27609233)
Supplement: Supplementary file [file 27609233]

| Gene name/ moult stage | Mean fold change relative to <i>C early</i> by qPCR | Standard error | P value |
|------------------------|-----------------------------------------------------|----------------|---------|
| <b>β-NAgase</b>        |                                                     |                |         |
| Inter 1                | 1.4                                                 | 0.7            | 0.204   |
| Inter 2                | 1.5                                                 | 0.99           | 0.486   |
| Inter 3                | -1.3                                                | 3.0            | 0.539   |
| Inter 4                | 4.2                                                 | 2.6            | 0.001   |
| D0 a                   | -2.9                                                | 4.3            | 0.162   |
| D0 b                   | -5.0                                                | 11.6           | 0.087   |
| D1-2                   | -24.7                                               | 39.2           | 0.046   |
| D3/A                   | -10.0                                               | 21.1           | 0.024   |
| <b>Trypsin</b>         |                                                     |                |         |
| Inter 1                | -4.4                                                | 3.3            | 0.338   |
| Inter 2                | -3.6                                                | 2.6            | 0.326   |
| Inter 3                | -11.9                                               | 8.3            | 0.197   |
| Inter 4                | 1.7                                                 | 2.3            | 0.730   |
| D0 a                   | -2.6                                                | 1.8            | 0.348   |
| D0 b                   | 1.7                                                 | 2.2            | 0.763   |
| D1-2                   | 24.4                                                | 33.5           | 0.023   |
| D3/A                   | 241.8                                               | 318.5          | 0.053   |
| <b>Cut9 cuticle</b>    |                                                     |                |         |
| Inter 1                | -11.4                                               | 8.2            | 0.037   |
| Inter 2                | -4.9                                                | 3.5            | 0.373   |
| Inter 3                | -1.9                                                | 1.4            | 0.758   |
| Inter 4                | -1.7                                                | 1.24           | 0.621   |
| D0 a                   | 1.2                                                 | 1.7            | 0.815   |
| D0 b                   | 5.8                                                 | 7.9            | 0.312   |
| D1-2                   | 19.4                                                | 26.5           | 0.001   |
| D3/A                   | 65.8                                                | 90.0           | 0.030   |
| <b>Cuticle CB6</b>     |                                                     |                |         |
| Inter 1                | 1.5                                                 | 1.9            | 0.585   |
| Inter 2                | 8.2                                                 | 11.4           | 0.202   |
| Inter 3                | 66.0                                                | 88.0           | 0.001   |
| Inter 4                | -1.4                                                | 1.2            | 0.93    |
| D0 a                   | 305.3                                               | 429.9          | 0.001   |
| D0 b                   | 523.2                                               | 694.4          | 0.001   |
| D1-2                   | 460.3                                               | 610.0          | 0.001   |
| D3/A                   | 1.2                                                 | 1.6            | 0.814   |
| <b>Collagen α1 (V)</b> |                                                     |                |         |
| Inter 1                | 1.2                                                 | 1.6            | 0.886   |
| Inter 2                | 12.7                                                | 15.9           | 0.099   |
| Inter 3                | 33.1                                                | 43.6           | 0.001   |
| Inter 4                | 2.0                                                 | 2.5            | 0.533   |
| D0 a                   | 42.6                                                | 55.8           | 0.001   |
| D0 b                   | 59.9                                                | 71.2           | 0.043   |
| D1-2                   | 158.7                                               | 188.7          | 0.001   |
| D3/A                   | 3.5                                                 | 4.2            | 0.321   |
